# Supplementary material for: Proton-coupled electron transfers in biomimetic water bound metal complexes. The electrochemical approach
Source: Royal Society of Chemistry journal article supplement (doi:10.1039/c004276e), 2010-09-03
Supplement: c004276e.pdf [file c004276e.pdf]

## Supporting Information

### Proton-coupled electron transfers in biomimetic water bound metal complexes. The electrochemical approach.

Elodie Anxolabéhère-Mallart, Cyrille Costentin, Clotilde Policar, <sup>||</sup> Marc Robert, Jean-Michel Savéant and Anne-Lucie Teillout

Laboratoire d'Electrochimie Moléculaire, Unité Mixte de Recherche Université - CNRS No 7591, Université Paris Diderot, Bâtiment Lavoisier, 15 rue Jean de Baïf, 75205 Paris Cedex 13, France.

<sup>||</sup> Groupe de chimie bioinorganique, Laboratoire des BioMolécules, Unité Mixte de Recherche Université - CNRS No 7203, Département chimie de l'ENS, 24 rue Lhomond, 75231 Paris Cedex 05, France.

A. Criteria for Proton transfer at equilibrium

Square scheme mechanism:

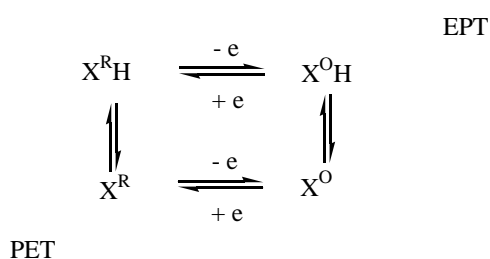

Scheme S1.

#### 1. PET pathway

We consider a situation where  $pK_{\text{X}^{\text{R}}\text{H}} > 14$

We assume that at each  $pH$  there is a buffer which  $pK_a$  is  $pH = pK_{a,Z}$  and thus  $K_{PT}^{PET} = \frac{k_p^{ap}}{k_{-p}^{ap}} = 10^{pH - pK_{\text{X}^{\text{R}}\text{H}}} < 1$

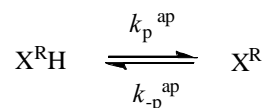

The zone diagram <sup>1</sup> (figure S1) depends upon two parameters:  $K_{PT}^{PET} = 10^{pH - pK_{\text{X}^{\text{R}}\text{H}}}$  and

$\lambda = \frac{RT}{F} \frac{(k_p^{ap} + k_{-p}^{ap})[Z]}{v} \approx \frac{RT}{F} \frac{k_{dif}[Z]}{v}$  It can be seen on this diagram that as soon as  $\log \lambda > 2$ , the boundary between DE and KE zone is given by  $\log K_{PT}^{PET} = 0.75 - 0.5 \log \lambda$ .

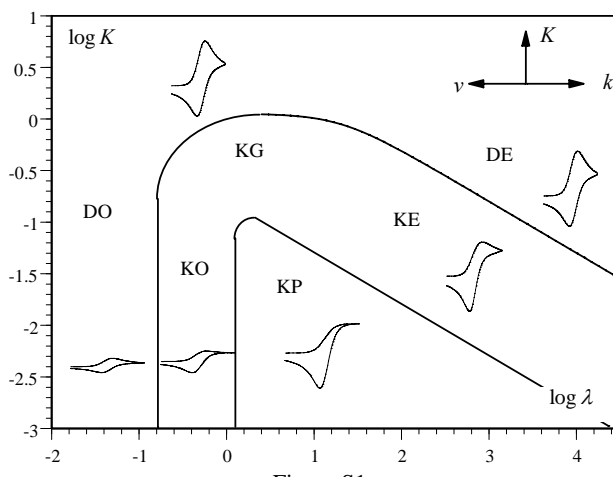

Figure S1.

## 2. EPT pathway

We consider a situation where  $pK_{X^{O}H} < 0$ .

We assume that at each  $pH$  there is a buffer which  $pKa$  is  $pH = pK_{a,Z}$  and thus  $K_{PT}^{EPT} = \frac{k_p^{ap}}{k_{-p}^{ap}} = 10^{pH - pK_{X^{O}H}} < 1$

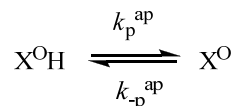

The zone diagram <sup>2</sup> (figure S2) depends upon two parameters :  $K_{PT}^{EPT} = 10^{pH - pK_{X^{O}H}}$  and

$\lambda = \frac{RT(k_p^{ap} + k_{-p}^{ap})[Z]}{Fv} \approx \frac{RT k_{dif}[Z]}{Fv}$  It can be seen on this diagram that as soon as  $\log \lambda > 1.5$ , the boundary between DE and KE zone is given by  $\log K_{PT}^{EPT} = -0.75 - 0.5 \log \lambda$ .

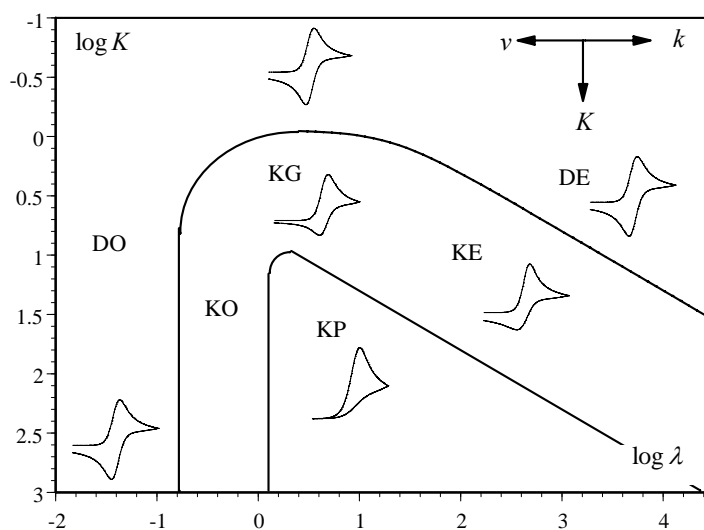

Figure S2.

### B. Behavior at $pH < 6$ : UV-vis experiments

At low  $pH$  characteristic bands of the complex (250 nm and 288 nm) disappear at the expense of a new band at 274 nm showing a modification of the complex. Bands at 274 nm and 288 nm have been identified as characteristics of phenol and phenolate respectively by comparison of free phenol and phenolate in aqueous solution.

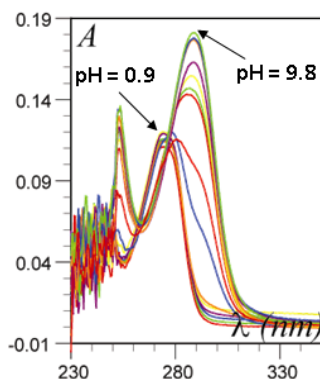

Figure S3. UV-vis spectra for  $[Mn^{II}LNH(H_2O)]^{2+}$  ( $c=3.10^{-5}$  M) in aqueous media (cuvette length= 1cm)

$pH$  is adjusted by small addition of concentrated  $HBF_4$  or concentrated  $NaOH$ .

$pH = 0.9, 1.5, 2.1, 3.1, 4, 4.9, 5.3, 5.8, 6.3, 7.3, 6.1, 7.5, 8.1, 8.9, 9.8$ .

C. Cyclic voltammograms at various scan rates

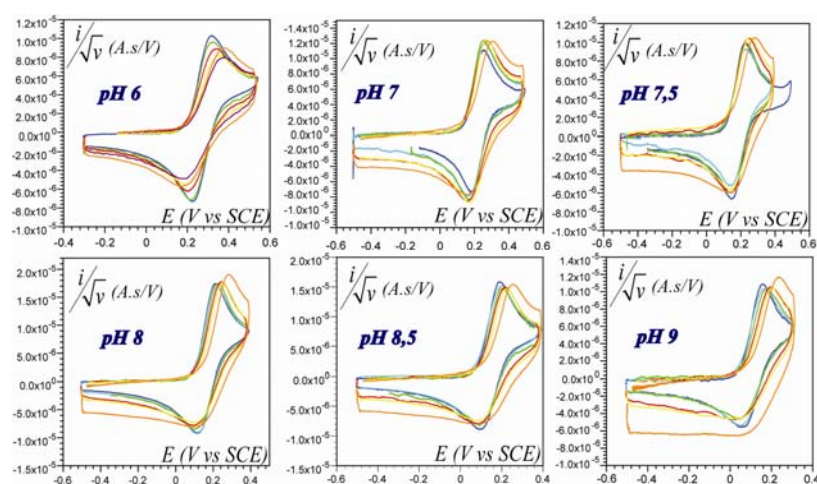

**Figure S4.** Voltammograms for  $[\text{Mn}^{\text{II}}\text{LNH}(\text{H}_2\text{O})]^{2+}$  oxidation in MES, HEPES et TABS 0.1 M buffers at various scan rates and pH. Glassy carbon electrode (1mm) , under argon. (dark blue) : 0.2 V/s, (blue) : 0.5 V/s, (green) : 1 V/s, (red) : 5 V/s (yellow) : 10 V/s, (magenta) : 20 V/s, (orange): 50 V/s

D. References

1. Savéant, J-M. In *Elements of Molecular and Biomolecular Electrochemistry*, Wiley-Interscience; Hoboken: 2006 p 93.
2. Savéant, J-M., Vianelo, E. *Electrochim. Acta*, **1967**, *12*, 629.
